# Supplementary material
Source: PubMed Central journal article supplement (PMC6789642)
Supplement: pnas.1911992116.sapp.pdf [file pnas.1911992116.sapp.pdf]

## SI Appendix

### **Inhibition of $\Delta 24$ -dehydrocholesterol-reductase activates pro-resolving lipid mediator biosynthesis and inflammation resolution**

Andreas Körner<sup>1</sup>, Enchen Zhou<sup>2</sup>, Christoph Müller<sup>3</sup>, Yassene Mohammed<sup>4</sup>, Sandra Herceg<sup>3</sup>, Franz Bracher<sup>3</sup>, Patrick CN Rensen<sup>2</sup>, Yanan Wang<sup>2</sup>, Valbona Mirakaj<sup>1</sup> and Martin Giera<sup>4</sup>

**S1: qPCR analysis of SH42/GSK2033 co-treatment and evaluation of additional transcription factor target genes without FCS being present (=active distal cholesterol biosynthesis). n.d. not detected.** Mean±SEM, non-parametric students t-test (Mann-Whitney, one per conditions against control). Inhibitor experiments with GSK2033 were carried out as follows: In the GSK 2033 treated groups, cells were pretreated with GSK 2033 (5 µM) for 2 hours before SH42 treatment. Cells were ultimately incubated with SH42 (5 µM). RNA was isolated using Tripure RNA Isolation reagent (Roche) according to the manufacturer's protocol. Total RNA (1 µg) was reverse transcribed using Moloney Murine Leukemia Virus (M-MLV) Reverse Transcriptase (Promega) for RT-qPCR according to the manufacturer's instructions to produce cDNA. mRNA expressions were normalized to β-actin and Cyclophilin A mRNA expressions and expressed as fold change compared to vehicle-treated groups using the ΔΔCT method. Primer sequences can be found in **SI Appendix S11**. For further details please refer to the materials and methods section **LXR selectivity assessment**.

## No FCS

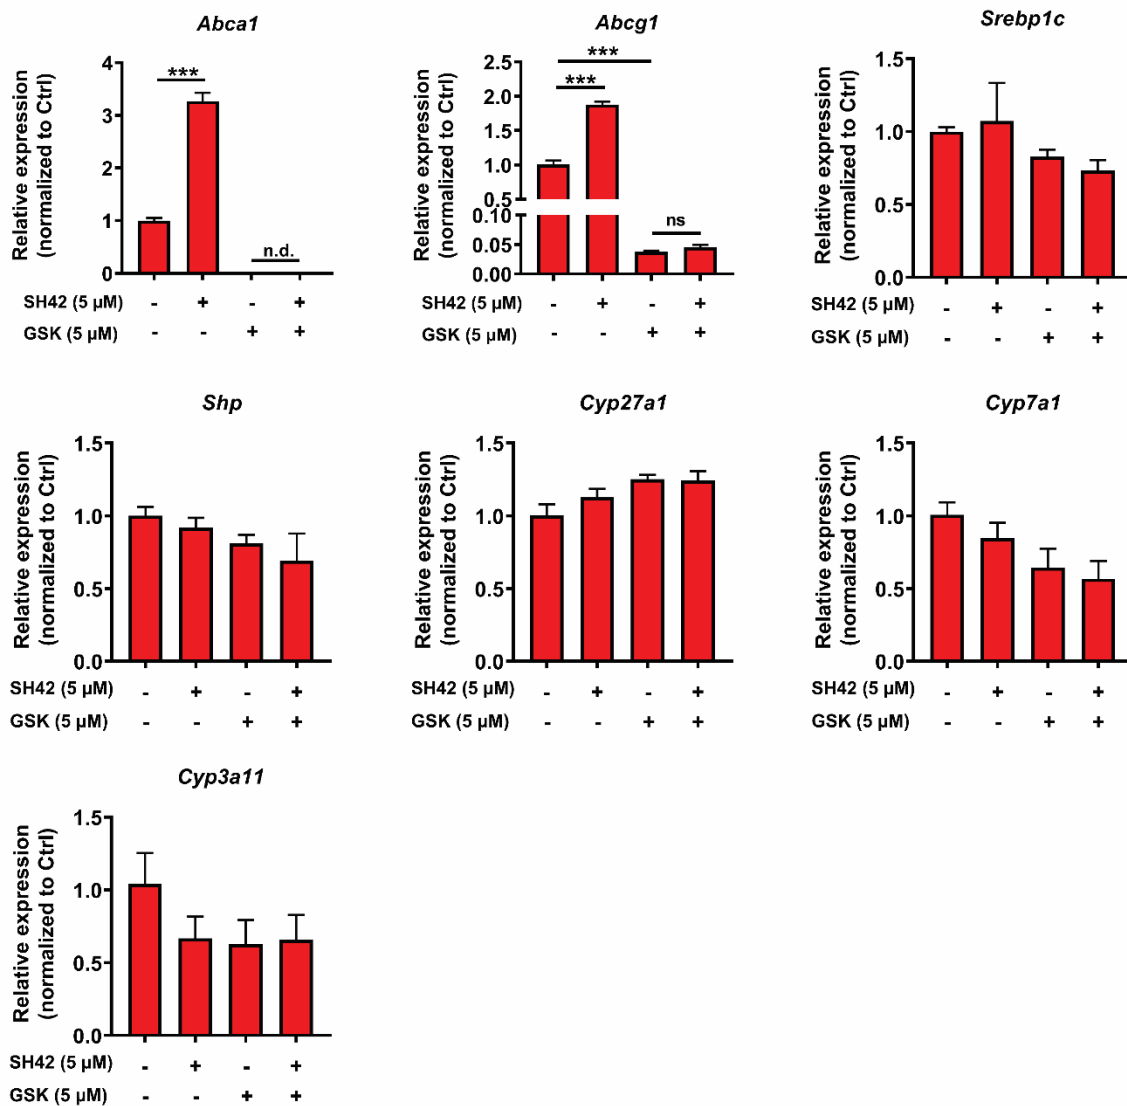

**S2: qPCR analysis of SH42/GSK2033 co-treatment and evaluation of additional transcription factor target genes with FCS being present (=inactive distal cholesterol biosynthesis), n.d. not detected.**

Inhibitor experiments with GSK2033 were carried out as follows: In the GSK 2033 treated groups, cells were pretreated with GSK 2033 (5  $\mu$ M) for 2 hours before SH42 treatment. Cells were ultimately incubated with SH42 (5  $\mu$ M). RNA was isolated using Tripure RNA Isolation reagent (Roche) according to the manufacturer's protocol. Total RNA (1  $\mu$ g) was reverse transcribed using Moloney Murine Leukemia Virus (M-MLV) Reverse Transcriptase (Promega) for RT-qPCR according to the manufacturer's instructions to produce cDNA. mRNA expressions were normalized to  $\beta$ -actin and Cyclophilin A mRNA expressions and expressed as fold change compared to vehicle-treated groups using the  $\Delta\Delta$ CT method. Primer sequences can be found in **SI Appendix S11**. For further details please refer to the materials and methods section **LXR selectivity assessment**.

**10% FCS**

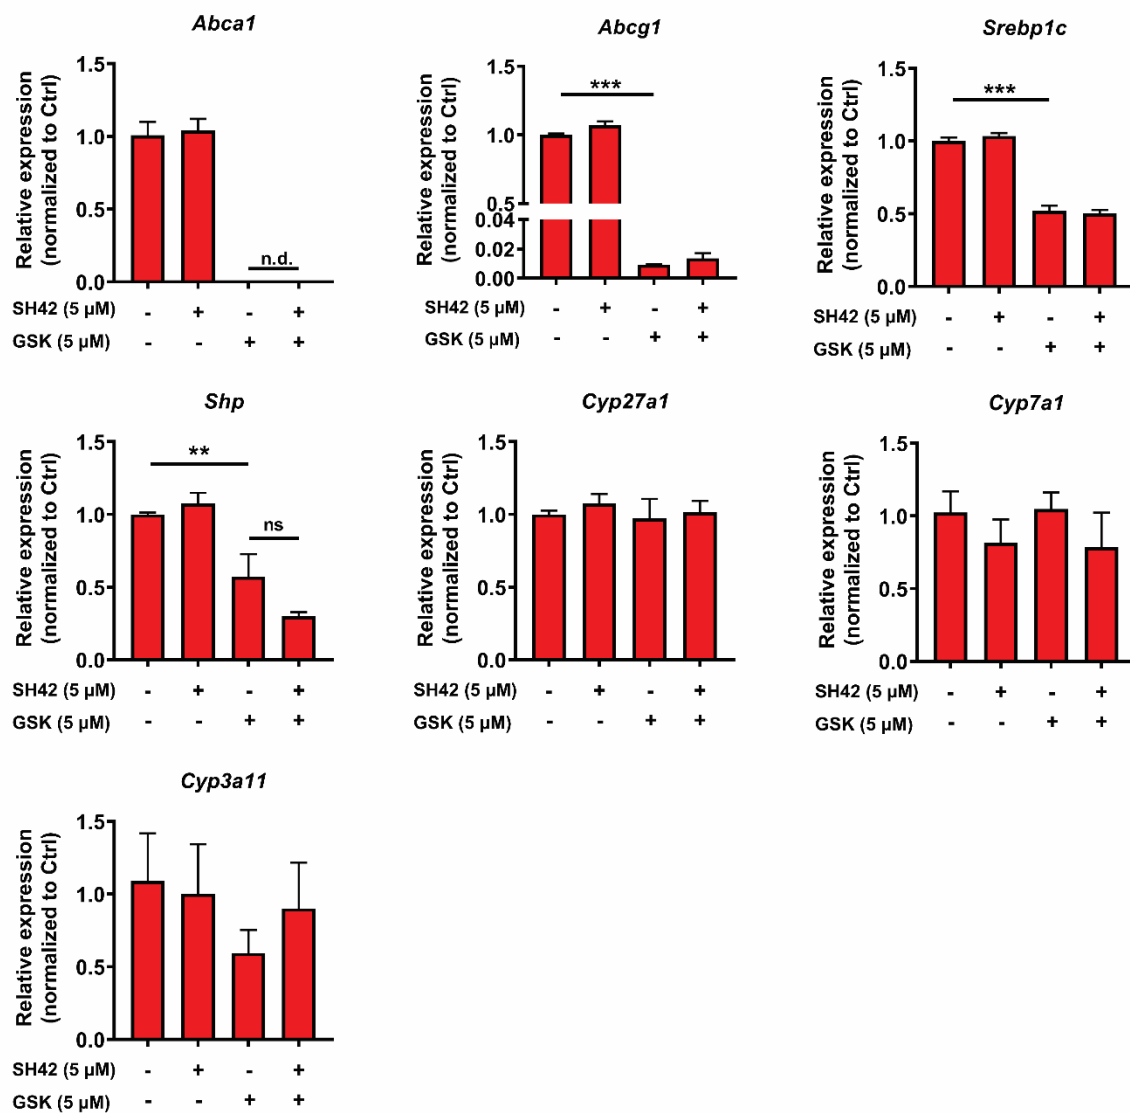

**S3: Serum (above) and liver (below) lipid class composition obtained after three day treatment with 0.5 mg/d SH42 versus vehicle control (Ctrl).** All experiments n=5, mean±SEM, non-parametric students t-test (Mann-Whitney), \* p<0.05, \*\*p<0.01. LPE lysophosphatidylethanolamine, LPC lysophosphatidylcholine, PC phosphatidylcholine, PE phosphatidylethanolamine, DAG diacylglyceride, SM sphingomyeloid, TAG triacylglyceride, FFA free fatty acid, CE cholesteryl ester. Lipid compositional analysis for the aforementioned lipid classes is shown. Lipidomics analysis was carried out as described in **SI Appendix S15**.

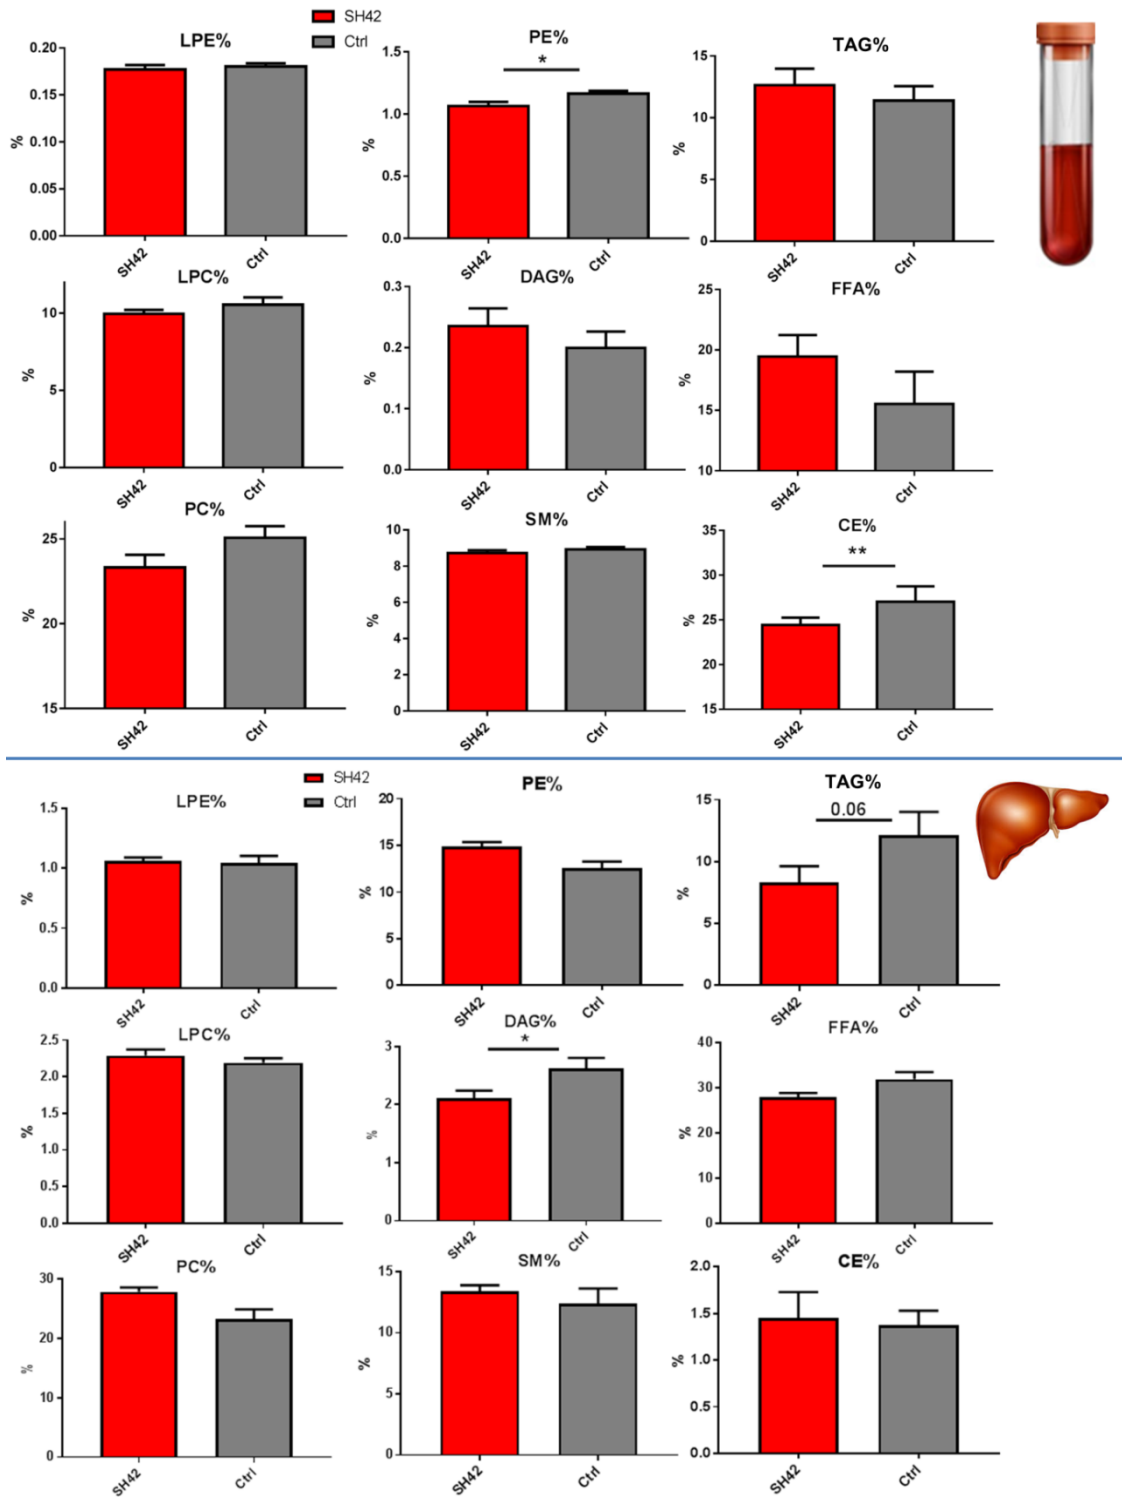

**S4: Serum free fatty acid (FFA) concentration, \*\* p<0.01, mean±SEM, non-parametric students t-test (Mann-Whitney) n=5, FFA = free fatty acids.** The serum FFA concentration as obtained by quantitative lipidomics analysis (SI Appendix S15) is shown. The absolute concentration of the FFA lipid class is shown as nmol/g serum.

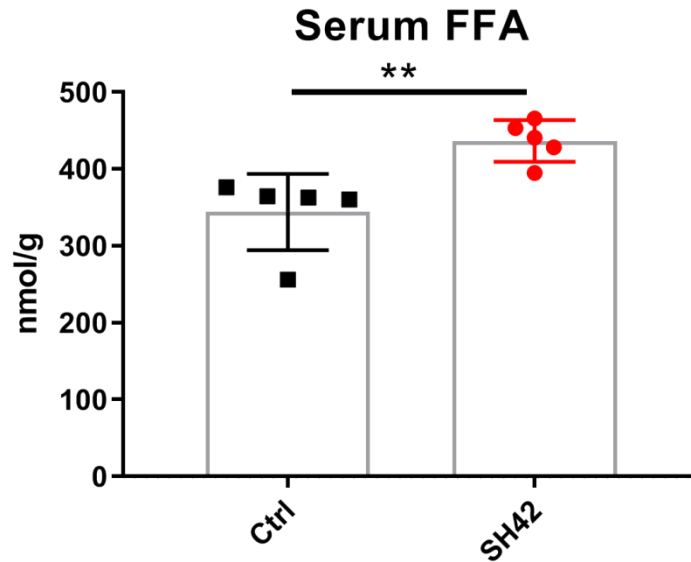

**S5: qPCR analysis of liver genes comparing vehicle and 3 day SH42 treatment.** All experiments n=5. non-parametric students t-test (Mann-Whitney), mean±SEM, \* p<0.05. Murine liver samples were first carefully disrupted using a tissue homogenizer (PqLab Precellys 24). Then, RNA was isolated using peqGOLD TriFast (VWR) and subsequently cDNA synthesized via reverse transcription using iScript™ cDNA Synthesis Kit (Bio-Rad). All procedures were performed according to the manufacturer’s instructions. The primer sequences can be found in SI Appendix S11.

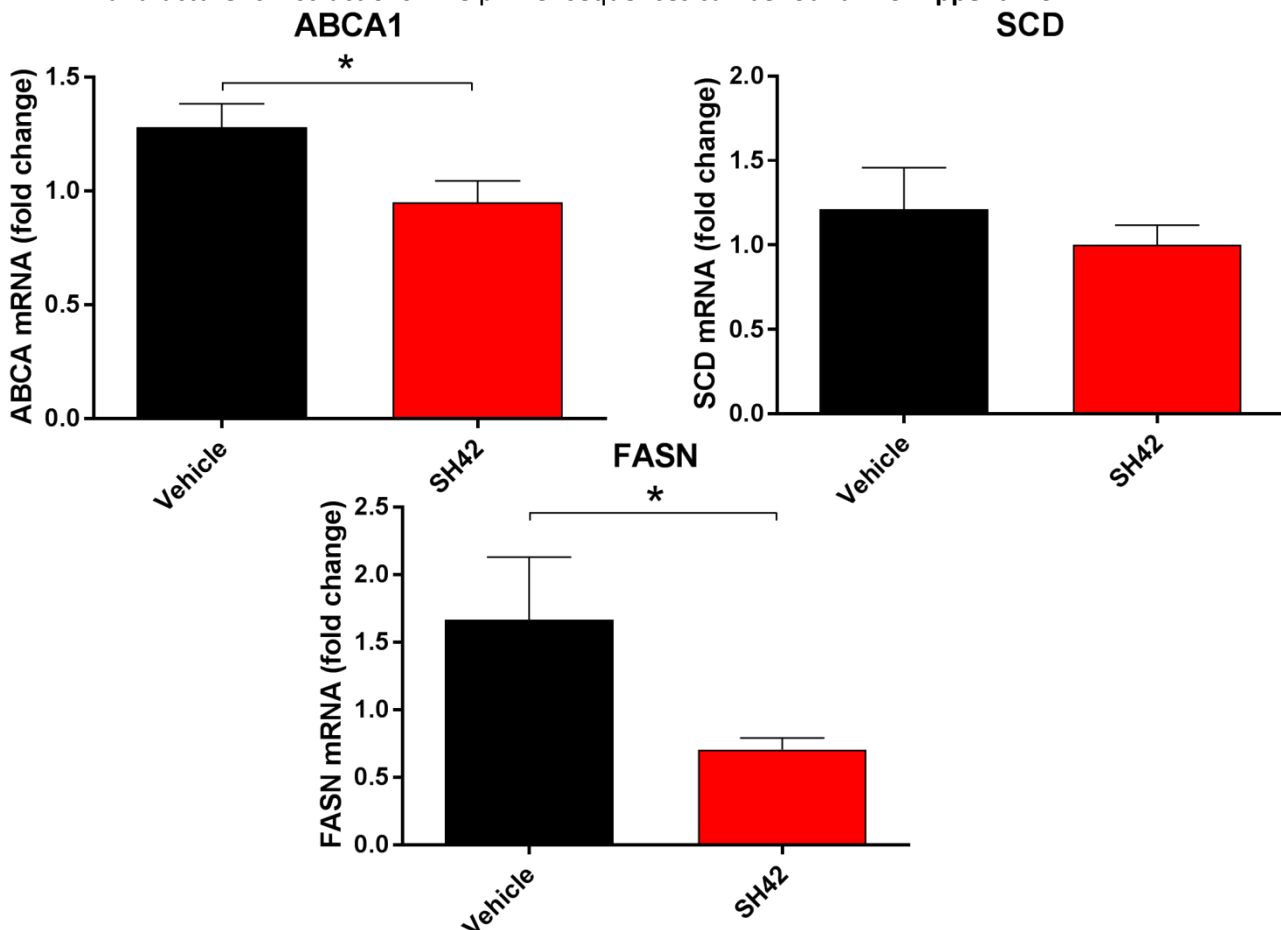

**S6: LTB<sub>4</sub> analysis, non-parametric students t-test (Mann-Whitney), mean±SEM, n=4-5.** LTB<sub>4</sub> was assessed using LC-MS analysis as described in **SI Appendix S16**. Mice were sacrificed 4 and 12 hours after zyA injection with and without SH42 treatment (0.5mg for 3 days). Area ratios corrected for the internal standard d4-LTB<sub>4</sub> and cell numbers are given.

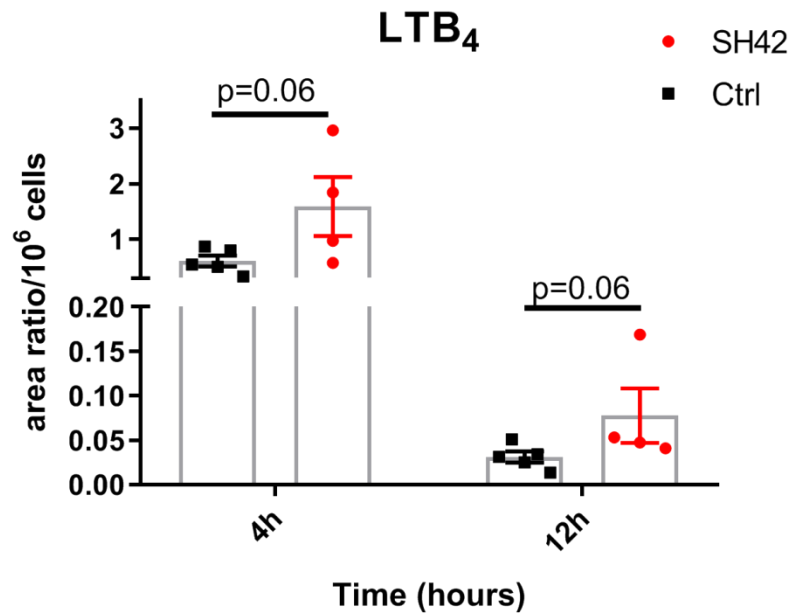

S7: Tandem MS spectra for MaR1 in comparison to authentic standard material.

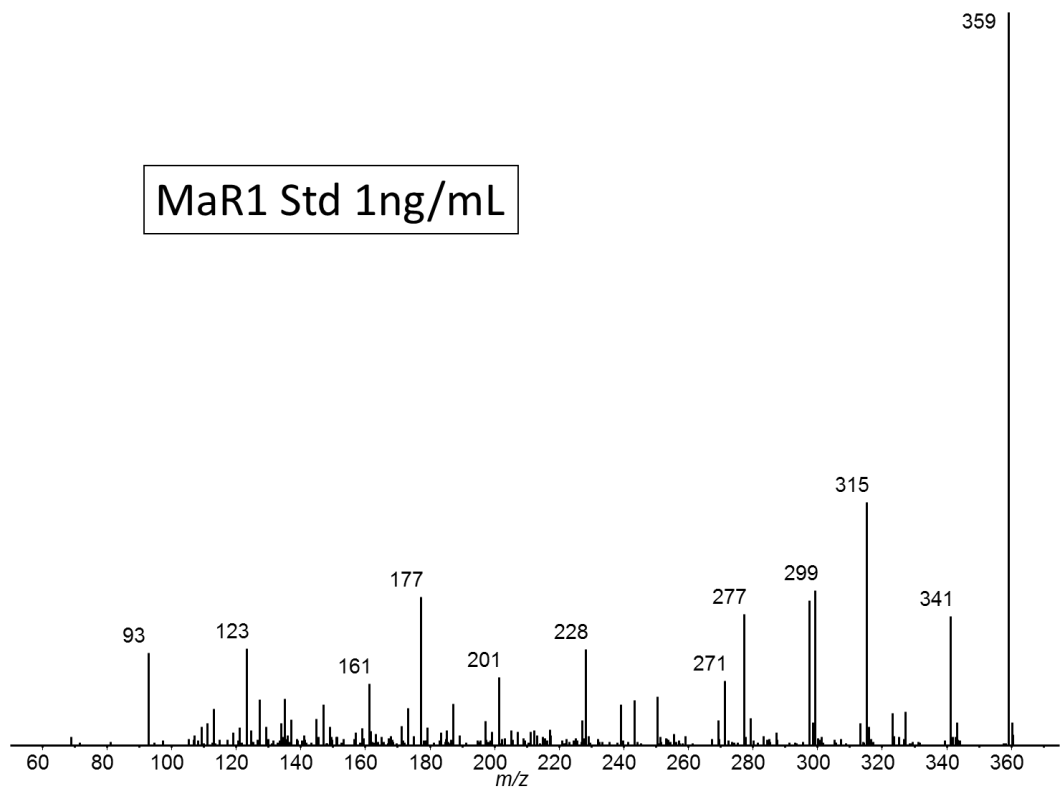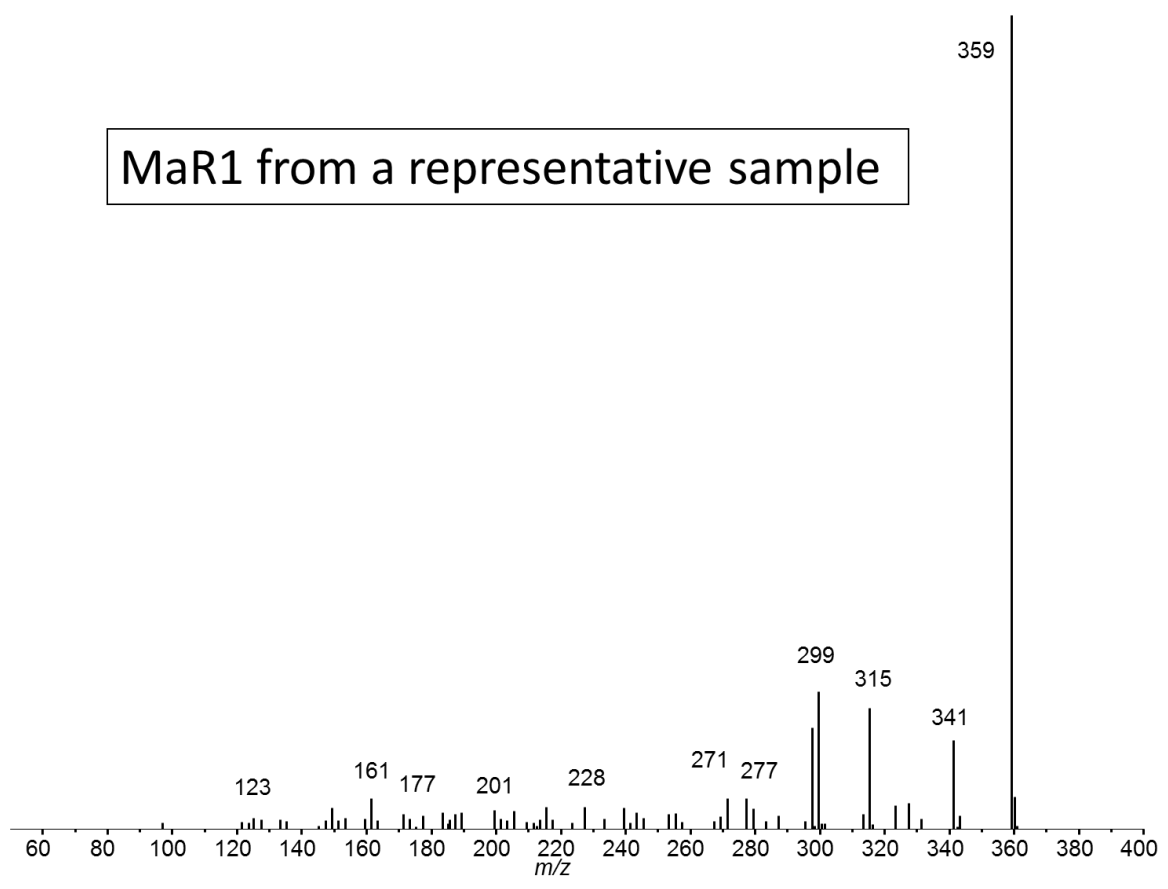

**S8: Validation experiment for DHA, MaR1 and 19,20-EpDPA, non-parametric students t-test (Mann-Whitney), one per time point, mean±SEM, n=4-5, \* p<0.05.** Lipids were assessed using LC-MS analysis as described in **SI Appendix S16**. Mice were sacrificed 4 and 12 hours after zyA injection with and without SH42 treatment. Area ratios corrected for the internal standards d4-LTB<sub>4</sub> (19,29-EpDPA and MaR1) or d5-DHA (DHA) and cell numbers are given.

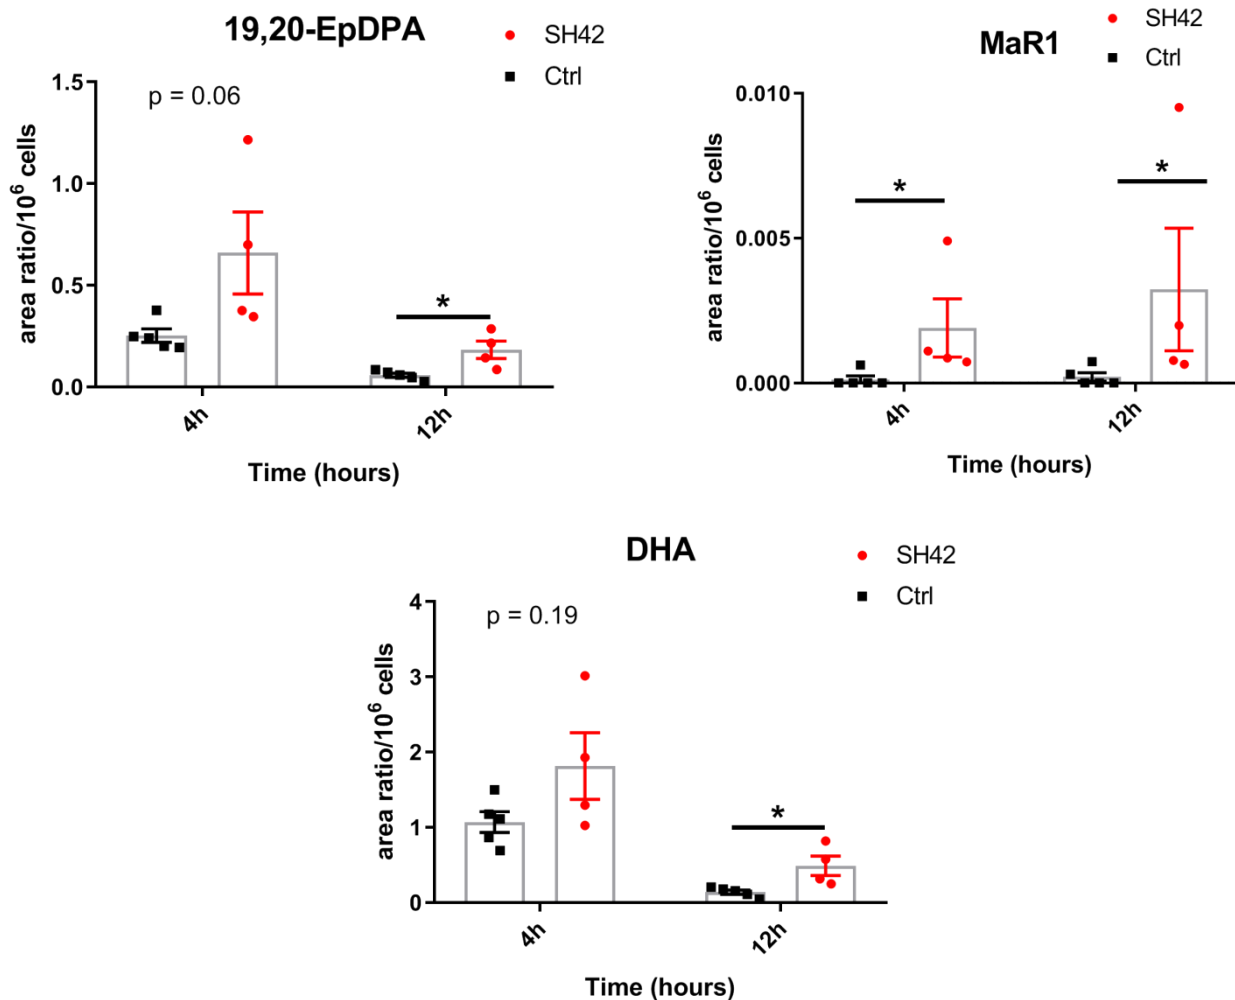

**S9 Procedures used for cell shape analysis.** Cell shape analysis has become an accepted parameter differentiating M1 and M2 MΦs (1). Image analysis was carried out as described elsewhere (2) and lined out below. Human peripheral blood monocytes (PBMCs) were isolated from human leukapheresis collars from the Blood Bank of Eberhard Karls University of Tübingen. Cells were then cultured in RPMI 1640 medium supplemented with either 10 ng/ml human recombinant GM-CSF (Macs Milteny) for M1 differentiation, 100 ng/ml M-CSF (Macs Milteny) for M2 differentiation, 0.01 µg/ml Desmosterol (Sigma Aldrich) or 250 µg/ml SH42 at 37°C for 7 d. The cell morphology was then analyzed by phase contrast images using a Leica inverted microscope equipped with a AxioCam MRc color camera (Zeiss) and measurements of cell shape, cell length and perimeter in each high-power



field (magnification  $\times 200$ ) performed with AxioVision software (Zeiss). Representative pictures are shown in Figure 8. The obtained data from  $n=80-90$  cells for each condition is plotted in Figure 8.

**S10 Baicalein blocks the SH42 induced accumulation of the 15-LOX pathway markers 15-HETE and 17-HDHA.** M1 macrophages ( $5 \times 10^6$  cells) were treated with zyA and SH42 with and without 1  $\mu\text{g}/\text{mL}$  Baicalein for 24 hours.  $N=8$ , mean $\pm$ SEM, (4 biological (donors) and 2 technical repeats). Non parametric students t-test (Mann-Whitney), \*  $p < 0.05$ , \*\*  $p < 0.01$ . 15-HETE and 17-HDHA were assessed using LC-MS analysis as described in **SI Appendix S16**. Area ratios corrected for the internal standard d8-15-HETE are shown.

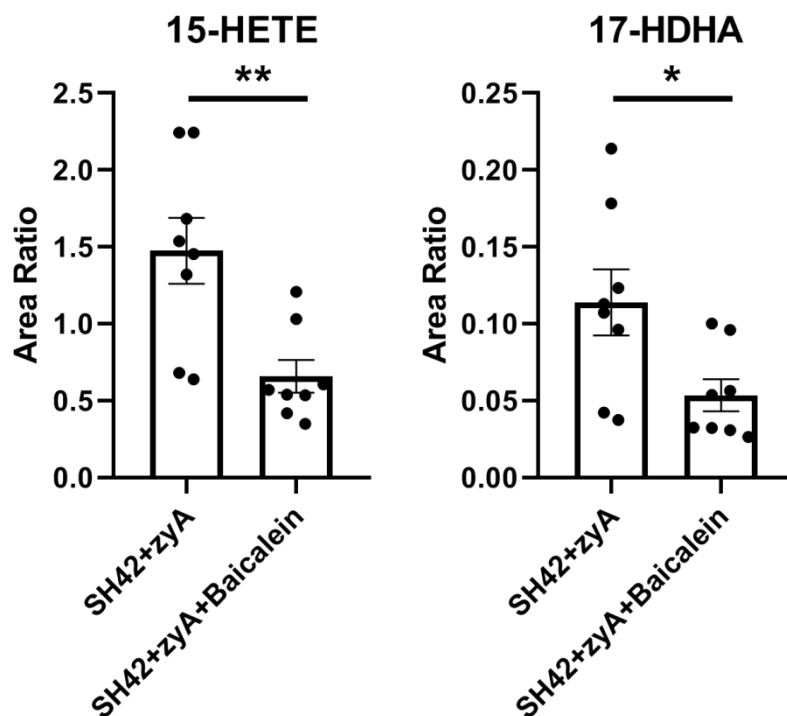

### S11 Primer sequences

#### Liver gene expression (Figure S5)

| Gene         | Forward Primer Sequence (5'-3') | Reverse Primer Sequence (5'-3') |
|--------------|---------------------------------|---------------------------------|
| <i>Abca1</i> | GTGGGCTCCTCCCTGTTTT             | TCTGAGAAACTGTCCTCCTTTT          |
| <i>SCD1</i>  | AGGATTTTCTACTACATGACCAGCG       | CACGTCATTCTGGAACGCCA            |
| <i>FASN</i>  | GACTCGGCTACTGACACGAC            | CGAGTTGAGCTGGGTTAGGG            |

*Abca1*, ATP-binding cassette sub-family A member 1; *SCD-1*, Stearoyl-CoA desaturase-1, *FASN* fatty acid synthase

## LXR and LXR selectivity assessment

| Transcription factor | Gene                 | Forward Primer Sequence (5'-3') | Reverse Primer Sequence (5'-3') |
|----------------------|----------------------|---------------------------------|---------------------------------|
| LXR                  | <i>Abca1</i>         | CCCAGAGCAAAAAGCGACTC            | GGTCATCATCACTTTGGTCCTTG         |
| LXR                  | <i>Abcg1</i>         | AGGTCTCAGCCTTCTAAAGTTCCTC       | TCTCTCGAAGTGAATGAAATTTATCG      |
|                      | <i>β-actin</i>       | AACCGTGAAAAGATGACCCAGAT         | CACAGCCTGGATGGCTACGTA           |
|                      | <i>Cyclophilin A</i> | ACTGAATGGCTGGATGGCAA            | TGTCCACAGTCGGAAATGGT            |
| PXR                  | <i>Cyp3a11</i> ,     | CACAAACCGGAGGCCTTTTG            | ATCCATGCTGTAGGCCCCAA            |
| PXR; FXR             | <i>Cyp7a1</i>        | CAGGGAGATGCTCTGTGTTCA           | AGGCATACATCCCTCCGTGA            |
| PXR; RXR             | <i>Cyp27a1</i>       | TCTGGCTACCTGCACTTCT             | CTGGATCTCTGGGCTCTTTG            |
| FXR                  | <i>Shg</i>           | TCTGCAGGTCGTCCGACTATT           | TGTCTGGCTAGGACATCCA             |
| LXR                  | <i>Srebp1c</i>       | AGCCGTGGTGAGAAGCGCAC            | ACACCAGGTCCTCAGTGATTTGCT        |

*Abca1*, ATP-binding cassette sub-family A member 1; *Abcg1*, ATP-binding cassette sub-family G member 1; *Srebp1c*, sterol regulatory element-binding protein 1 isoform c, *Cyp*, cytochrome P.

## Peritoneal cell analysis

| Gene          | Forward Primer Sequence (5'-3') | Reverse Primer Sequence (5'-3') |
|---------------|---------------------------------|---------------------------------|
| <i>18S</i>    | GTAACCCGTTGAACCCATT             | CCATCCAATCGGTAGTAGCG            |
| <i>SCD-1</i>  | TCGGGATTTTCTACTACATGACCA        | ACGTCATTCTGGAACGCCA             |
| <i>Elovl1</i> | GCCTCGAATCATGGCTAATC            | CCTTGGAAAGCATGAAGAGC            |
| <i>Elovl5</i> | ATGGACACCTTTTTCTTCATCCTT        | ATGGTAGCGTGGTGGTAGACATG         |
| <i>Elovl6</i> | TCGAACTGGTGCTTACATGC            | GAGCACAGTGATGTGGTGGT            |
| <i>Fads6</i>  | CAGCACATCGGACTGCCTAT            | ACACCAAGGGCTTCACCTTC            |

*SCD-1*, Stearoyl-CoA desaturase-1; *Elovl1, 5, 6* Elongation of very long chain fatty acids protein 1, 5, 6; *Fads6*, fatty acid desaturase 6

## Macrophage phenotype determination (human)

| Gene            | Forward Primer Sequence (5'-3') | Reverse Primer Sequence (5'-3') |
|-----------------|---------------------------------|---------------------------------|
| <i>ALX/FPR2</i> | TGT TCT GCG GAT CCT CCC ATT     | CTC CCA TGG CCA TGG AGA CA      |
| <i>Arg1</i>     | TGG ACA GAC TAG GAA TTG GCA     | CCA GTC CGT CAA CAT CAA AAC T   |
| <i>BAI1</i>     | AGC CAC TGA CAT CAG CTT CC      | ATG CTT CAT CGG CCT CTG TC      |
| <i>CD36</i>     | CTTGGCTTAATGAGACTGGGAC          | GCA ACA AAC ATC ACC ACA CCA     |
| <i>CD80</i>     | AGC CTC ACC TCT CCT GGT TG      | TGG GGC AAA GCA GTA GGT CA      |
| <i>CD163</i>    | ACA ACA GGT CGC TCA TCC C       | GTG TGG CTC AGA ATG GCC T       |
| <i>CD206</i>    | CCC TCA GAA AGT GAT GTG CCT     | TCT CCA CGA AGC CAT TTG GT      |
| <i>ChemR23</i>  | AGG GAC TGA TTG GCT GAG GA      | ATC CTC CAT TCT CAT TCA CCG T   |
| <i>CX3CR1</i>   | AAT GCC TGG CTG TCC TGT GT      | GCC TGC TCC TTT GTG ATT CAG     |
| <i>GPR18</i>    | ACA GAA GTG GAA GTG CTG AAA A   | CAG AAA GCA GCA CCT CCT GT      |
| <i>GPR32</i>    | GGG CCT GCA AAC TCT ACA         | GGA GGC AGT TAC TGG CAA         |

|               |                                 |                             |
|---------------|---------------------------------|-----------------------------|
| <i>IL-6</i>   | CAC CAG GCA AGT CTC CTC AT      | GAC AGC CAC TCA CCT CTT CA  |
| <i>IL-10</i>  | AAT CGA TGA CAG CGC CGT AG      | GGT TGC CAA GCC TTG TCT GA  |
| <i>STAT-1</i> | ATC AGG CTC AGT CGG GGA ATA     | TGG TCT CGT GTT CTC TGT TCT |
| <i>TIM4</i>   | ACA GGA CAG ATG GAT GGA ATA CCC | AGC CTT GTG TGT TTC TGC G   |

---

*FPR2*, N-formyl peptide receptor 2; *Arg1*, Arginase 1; *STAT-1*, Signal transducer and activator of transcription 1; *TIM4*, T-cell immunoglobulin mucin protein 4.

### S12 GC-MS analysis.

We used a Bruker Scion GC/MS system, operated in scan mode from  $m/z$  100-550. Helium 99.9990% was used as carrier gas at a constant flow rate of 1.4 mL/min. Injector and transfer line were operated at 280 °C. The oven program started at 90 °C held for 0.5 minute, then ramped to 270 °C at 30 °C/minute, ramped to 310 °C at 10 °C/minute. The following masses were used to quantify desmosterol levels against an external calibration line (0 – 10 ppm)  $m/z$  445 + 355 for cholestanol (IS),  $m/z$  357 and 271 for cholestan (IS) and  $m/z$  343 + 253 for desmosterol.

Serum desmosterol levels were determined as described elsewhere (3). Liver desmosterol levels, were monitored as follows: livers samples were homogenized in a bullet blender after the addition of 500  $\mu$ L LC-MS grade water for 2 min. To 100  $\mu$ L of the homogenate was added 100  $\mu$ L 10M NaOH and 10  $\mu$ L of a cholestanol solution (100  $\mu$ g/mL, serving as internal standard). The sample was hydrolysed for 30 minutes at 60°C. After the addition of 100  $\mu$ L LC-MS grade water, lipids were extracted with 500  $\mu$ L methyl-*tert*-butyl ether (MTBE). The organic extract was dried under a gentle stream of nitrogen and 29  $\mu$ L MTBE, 20  $\mu$ L MSTFA and 1  $\mu$ L pyridine were added. After storing the sample for 30 minutes at room temperature, 1  $\mu$ L was injected splitless. In the case of peritoneal cell desmosterol levels, cells were pelleted and washed once with PBS. The cell pellet was resuspended in 250  $\mu$ L 2-propanol and washed into a glass vial. The tube was subsequently washed with another portion of 250  $\mu$ L 2-propanol and the organic solvent was combined. After drying under a gentle stream of nitrogen 100  $\mu$ L water and 50  $\mu$ L 10 M NaOH and 10  $\mu$ L cholestan solution (100  $\mu$ g/mL, serving as internal standard) (cholestanol in the case of macrophages) were added to the lavage cells and hydrolysis was accomplished for 30 min at 60°C, lipids were extracted twice with 500  $\mu$ L methyl-*tert*-butyl ether (MTBE). The organic extract was dried under a gentle stream of nitrogen and 79  $\mu$ L MTBE, 20  $\mu$ L MSTFA and 1  $\mu$ L pyridine were added. After storing the sample for 30 minutes at room temperature, 1  $\mu$ L was injected splitless. For whole blood analysis after 1 or 2 days of SH42 treatment, 50  $\mu$ L whole blood was spiked with 10  $\mu$ L cholestan solution and 25  $\mu$ L 10M NaOH and 100  $\mu$ L water for hydrolysis were added. Extraction and derivatization was carried out as described

for the lavage cells. For all experiments a freshly prepared calibration line with authentic desmosterol (0-10 ppm) was prepared on the day of analysis.

### **S13 Leukocyte differentiation and flow cytometry analysis (gating strategy shown below).**

Peritoneal lavages (4 mL in PBS(-/-)) were taken at dedicated time points after zyA injection and prepared to determine the cellular distributions. First, a 2mL lavage aliquot was spun down (300xg, 5 min, 4°C) and the pellet resuspended in 300 µL of Flow Cytometry Staining Buffer (1x PBS(-/-), 1% BSA, 2 mM NaN<sub>3</sub>)(FCSB) and 100 µL sample volume was then transferred to a 96 well plate (round bottom). Antibodies were diluted with FCSB before use (see materials and methods section **Zymosan A induced peritonitis and FACS analysis**). For differential cell count cells were blocked with mouse anti-CD16/CD32 antibodies (Biolegend) for 10 min at room temperature. Then, cells were stained with anti-mouse APC-Ly6G, e450-F4/80 (eBioscience) and FITC-Ly6C (BioLegend) antibodies for 30 min at 4°C. For defining MΦ efferocytosis of apoptotic PMNs, the differentiation of intra- and extracellular PMN was assessed by using differential Ly6G-staining with a permeabilization step. Cells were permeabilized using a fixation and permeabilization kit (BD) according to the manufacturer's instructions. After this step, the second Ly6G staining (Ly6G intracellular) was performed to also determine phagocytized apoptotic PMN. Phagocytized PMN were Ly6G intracellular positive (+) and Ly6G extracellular negative (-) (Panel 3). The cells were analyzed by flow cytometry on a FACSCanto II (BD) using FlowJo (Tree Star Inc.). For further details please also refer to the materials and methods section **Zymosan A induced peritonitis and FACS analysis**.

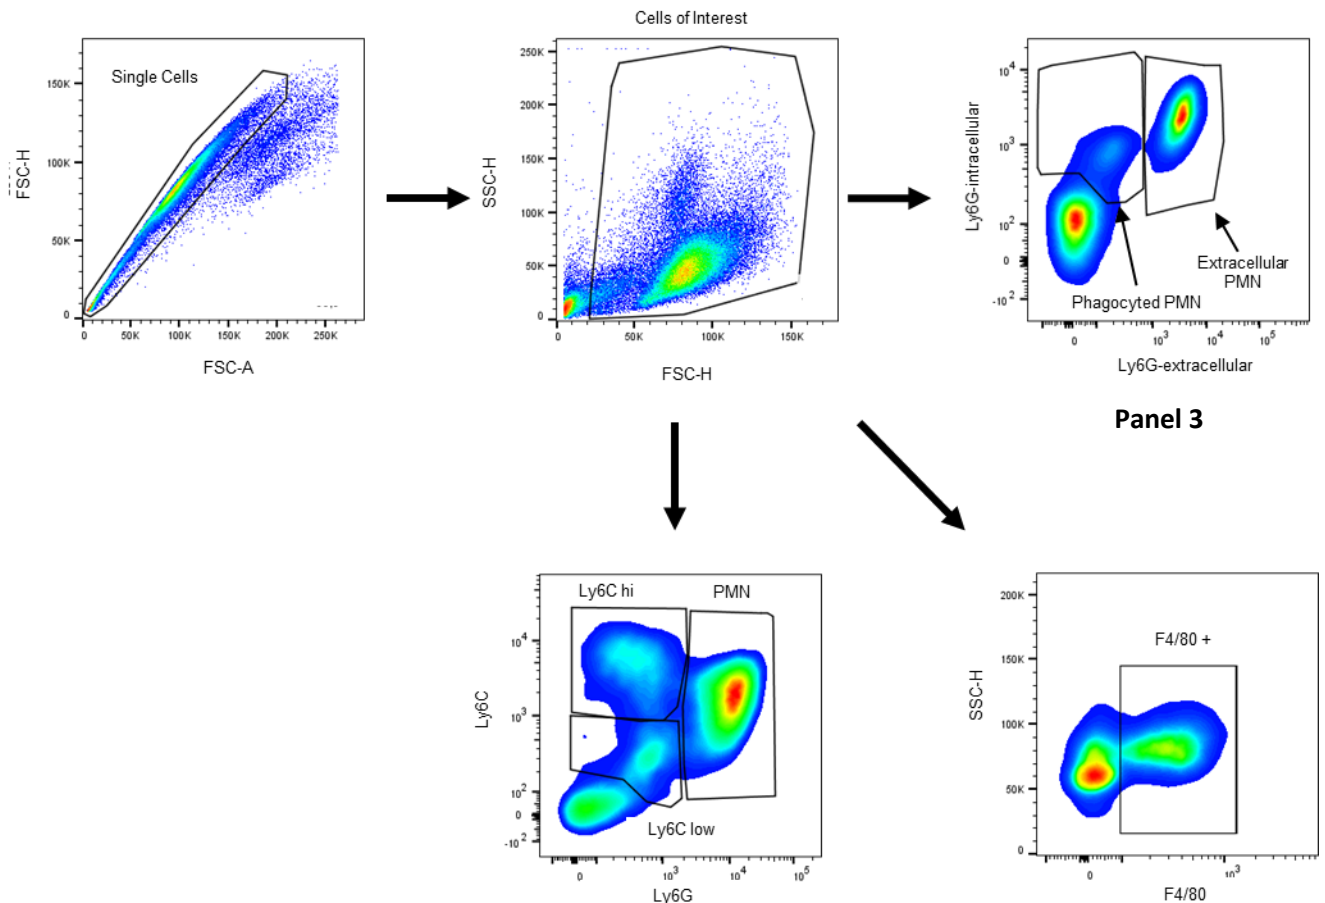

### S14 Protein array analysis

Average signal intensity of 6 replicates was normalized to the median signal of all antibodies on the array. The presented fold change represents the ratio of the normalized signal from SH42 treated mice compared with vehicle treated controls. GAPDH and beta actin were used as housekeeping proteins. Data analysis was performed with IPA software (Qiagen). Pathways were substantiated and updated with recent literature.

### S15 Quantitative lipidomics analysis

Briefly: for liver samples, one liver lobe was homogenized in an Eppendorf tube with 600  $\mu$ L LCMS grade water and pre-washed stainless steel beads. An aliquot corresponding to approximately 2 mg liver tissue was worked up. For serum samples, 100  $\mu$ L was worked up. To the samples in 2 mL Eppendorf tubes was added 100  $\mu$ L internal standard mix (Lipidyzer kit) in MTBE. Subsequently 500  $\mu$ L MTBE and 160  $\mu$ L methanol were added, the mixture was shaken for 30 minutes at room temperature, before 200  $\mu$ L of water was added. The samples were spun at 16,100  $\times$ g for 3 minutes

and the upper organic layer transferred to a glass vial. The remaining sample was extracted again by the addition of 300  $\mu$ L MTBE, 100  $\mu$ L methanol and 100  $\mu$ L for 30 minutes. After centrifugation the organic extracts were combined and dried under a gentle stream of nitrogen. The dry extract was dissolved in 250  $\mu$ L Lipidizer running buffer and analysed according to the manufacturers protocol (4, 5). For data analysis the Excel spread sheets (**SI datasets S1, S2 and S3**) were transformed into comma separated files (.csv). FA composition analysis calculates the total of a given FA within a class divided by the total of all the FA within that class. In this way a FA fractional analysis for each class of analysed lipids has been carried out. For further analysis volcano plots were built in order to visualize the different FA compositions of liver, serum and peritoneal cells. For this, missing values in each dataset were imputed with half of the minimum concentration value and all determined fractional values were centred around the mean value of each analyte. For the volcano plot we set the fold change threshold to 1.5 and the p-value threshold to 5%, and the control group was considered as the reference in all comparisons.

#### **S16 Targeted lipid mediator analysis**

Peritoneal lavage samples were spiked with 4  $\mu$ L of an internal standard solution (containing d4-PGE4, d4-LTB4 d8-15-HETE and d5-DHA at a concentration of 50 ng/ml (500ng/mL for d5-DHA) in methanol). The samples were transferred to a 12-ml glass vial, and 1.75 ml of methanol was added. The samples were centrifuged at 4,000 rpm for 5 min at 6 °C, and the supernatant was transferred to a fresh 12-ml glass vial. The pellet was re-extracted with 500  $\mu$ L of methanol and centrifuged as described above, and the organic extracts were combined. The methanol was partially removed under a gentle stream of nitrogen at 40 °C for 30 min. The remaining methanolic extract (approximately 1.5 ml) was diluted with 8 mL of water, and 10  $\mu$ L of 6 M HCl was added. The prepared samples were cleaned via solid phase extraction (SPE) (SepPak C18 200 mg, Waters, MA, USA). The samples were loaded onto preconditioned SPE cartridges (2 ml methanol, followed by 2 ml water), the cartridges were washed with 3 ml of water followed by 3 ml of n-hexane, and then the samples were eluted with 3 ml of methylformate. The eluate was dried under a gentle stream of nitrogen, reconstituted in 200  $\mu$ L of 40% methanol, and injected.

LC-MS/MS analysis was performed as described below. Briefly, a QTrap 6500 mass spectrometer operating in negative ESI mode (Sciex, Nieuwerkerk aan den IJssel, The Netherlands) was coupled to an LC system employing two LC-30AD pumps, a SIL-30AC autosampler, and a CTO-20AC column oven

(Shimadzu, 's-Hertogenbosch, The Netherlands). A 1.7  $\mu\text{m}$  Kinetex C18 50  $\times$  2.1 mm column protected with a C8 precolumn (Phenomenex, Utrecht, The Netherlands) was used, and the column was maintained at 50  $^{\circ}\text{C}$ . A binary gradient of water (A) and MeOH (B) containing 0.01% acetic acid was generated as follows: 0 min 30% B, held for 1 min, then ramped to 45% B at 1.1 min, 53.5% B at 2 min, 55.5% B at 4 min, 90% B at 7 min, and 100% B at 7.1 min, and held for 1.9 min. The injection volume was 40  $\mu\text{L}$ , and the flow rate was 400  $\mu\text{L}/\text{min}$ . For analyte identification, the mass transition used for each analyte was combined with its relative retention time (RRT). The calibration lines constructed with standard material for each analyte were used for quantification, and only peaks with a signal to noise (S/N) ratio > 10 were quantified

In the case of treated M1 M $\Phi$ , quenched cells in 1.5 mL methanol were spun for 5 min at 4000  $\times g$  and the supernatant transferred to a 1.5 mL glass vial. After spiking samples to a final concentration of 1 ng/mL (d4-PGE2, d4-LTB4 and d8-15HETE) and 10 ng/mL (d5-DHA) with internal standards, samples were dried under a gentle stream of nitrogen, resuspended in 150  $\mu\text{L}$  40% methanol, spun again for 3 min at 18.000  $\times g$  and transferred to micro vial inserts for LC-MS/MS analysis.

Please refer to **Table 1** below for further details.

**Table S1 LC-MS/MS settings**

| Group                                 | Compound      | Absolute Quantitation | Lipid Maps ID | Retention time [min] | m/z in Q1 | m/z in Q3 | Declustering potential [V] | Collision energy [V] | Collision cell exit potential [V] |
|---------------------------------------|---------------|-----------------------|---------------|----------------------|-----------|-----------|----------------------------|----------------------|-----------------------------------|
| Epoxydocosapentaenoic acids           | 19(20)-EpDPA  |                       | LMFA04000038  | 8.1                  | 343.1     | 281.1     | -70                        | -16                  | -11                               |
| Epoxyeicosatrienoic acids (EET)       | 11(12)-EET    |                       | LMFA03080004  | 8.2                  | 318.9     | 166.9     | -90                        | -18                  | -19                               |
| Epoxyeicosatrienoic acids (EET)       | 14(15)-EET    |                       | LMFA03080005  | 8.1                  | 319       | 218.9     | -5                         | -16                  | -55                               |
| Epoxyeicosatrienoic acids (EET)       | 8(9)-EET      |                       | LMFA03080003  | 8.2                  | 319       | 154.9     | -60                        | -18                  | -13                               |
| Hydroxydocosahexaenoic acids (HDHA)   | 10-HDHA       | Yes                   | LMFA04000027  | 7.9                  | 343.1     | 153       | -25                        | -20                  | -15                               |
| Hydroxydocosahexaenoic acids (HDHA)   | 14(S)-HDHA    |                       | LMFA04000058  | 8.0                  | 343.1     | 204.9     | -60                        | -18                  | -27                               |
| Hydroxydocosahexaenoic acids (HDHA)   | 17-HDHA       | Yes                   | LMFA04000072  | 7.9                  | 343.1     | 245       | -65                        | -16                  | -15                               |
| Hydroxydocosahexaenoic acids (HDHA)   | 4-HDHA        |                       | LMFA04000058  | 8.2                  | 343.1     | 101       | -50                        | -18                  | -9                                |
| Hydroxydocosahexaenoic acids (HDHA)   | 7-HDHA        | Yes                   | LMFA04000025  | 8.0                  | 343.1     | 141.1     | -85                        | -18                  | -23                               |
| Hydroxydocosapentaenoic acids (HDP A) | 19,20-DiHDP A | Yes                   | LMFA04000043  | 7.4                  | 361.1     | 273       | -55                        | -22                  | -15                               |
| Hydroxydocosapentaenoic acids (HDP A) | 7,17-DiHDP A  | Yes                   | N/A           | 7.0                  | 361.1     | 198.9     | -45                        | -26                  | -23                               |
| Hydroxyeicosapentaenoic acids (HEPE)  | 12-HEPE       |                       | LMFA03070031  | 7.6                  | 317       | 179       | -60                        | -18                  | -17                               |
| Hydroxyeicosapentaenoic acids (HEPE)  | 15-HEPE       | Yes                   | LMFA03070009  | 7.5                  | 317.1     | 219       | -65                        | -18                  | -19                               |
| Hydroxyeicosapentaenoic acids (HEPE)  | 18-HEPE       | Yes                   | LMFA03070038  | 7.4                  | 317.1     | 259       | -5                         | -16                  | -7                                |
| Hydroxyeicosapentaenoic acids (HEPE)  | 5-HEPE        |                       | LMFA03070027  | 7.7                  | 317       | 114.9     | -55                        | -18                  | -11                               |
| Hydroxyeicosatetraenoic acids (HETE)  | 11-HETE       | Yes                   | LMFA03060003  | 7.9                  | 319.1     | 167       | -70                        | -22                  | -15                               |
| Hydroxyeicosatetraenoic               | 12-HETE       | Yes                   | LMFA03060007  | 7.9                  | 319.1     | 179       | -65                        | -20                  | -23                               |

|                                                 |                                 |     |                              |     |       |       |      |     |     |
|-------------------------------------------------|---------------------------------|-----|------------------------------|-----|-------|-------|------|-----|-----|
| acids (HETE)                                    |                                 |     |                              |     |       |       |      |     |     |
| Hydroxyeicosatetraenoic acids (HETE)            | 14,15-diHETE                    | Yes | LMFA03060077                 | 7.0 | 335.1 | 207   | -65  | -24 | -21 |
| Hydroxyeicosatetraenoic acids (HETE)            | 15-HETE                         | Yes | LMFA03060001                 | 7.8 | 319.1 | 219.1 | -55  | -18 | -9  |
| Hydroxydocosatetraenoic acids                   | 17-OH-DH-HETE                   |     | N/A                          | 8.2 | 347.1 | 247   | -110 | -22 | -27 |
| Hydroxyeicosatetraenoic acids (HETE)            | 20-HETE                         |     | LMFA03060009                 | 7.7 | 319   | 289.1 | -70  | -24 | -15 |
| Hydroxyeicosatetraenoic acids (HETE)            | 5,15-diHETE                     | Yes | LMFA03060010                 | 6.8 | 335   | 173.1 | -55  | -20 | -11 |
| Hydroxyeicosatetraenoic acids (HETE)            | 5-HETE                          | Yes | LMFA03060002                 | 8.0 | 319.1 | 115   | -65  | -18 | -11 |
| Hydroxyeicosatetraenoic acids (HETE)            | 8(S),15(S)-diHETE               | Yes | LMFA03060050                 | 6.7 | 335.1 | 207.9 | -55  | -22 | -17 |
| Hydroxyeicosatetraenoic acids (HETE)            | 8-HETE                          | Yes | LMFA03060006                 | 7.9 | 319.1 | 154.9 | -70  | -20 | -19 |
| Hydroxyoctadecadienoic acids (HoDE)             | 13-HoDE                         |     | LMFA02000228                 | 7.7 | 295   | 194.9 | -110 | -24 | -21 |
| Hydroxyoctadecadienoic acids (HoDE)             | 9-HoDE                          |     | LMFA02000188                 | 7.7 | 295   | 171   | -130 | -22 | -7  |
| Hydroxyoctadecatrienoic acids (HoTrE)           | 13-HoTrE                        |     | LMFA02000051                 | 7.4 | 293   | 195   | -45  | -24 | -19 |
| Hydroxyoctadecatrienoic acids (HoTrE)           | 9-HoTrE                         |     | LMFA02000024                 | 7.4 | 293   | 170.9 | -75  | -20 | -15 |
| Internal standards                              | 15-HETE-d8                      |     | LMFA03060080                 | 7.8 | 327.2 | 226   | -85  | -18 | -11 |
| Internal standards                              | DHA-d5                          |     | LMFA01030762                 | 8.8 | 332   | 288.1 | -75  | -16 | -13 |
| Internal standards                              | LTB4-d4                         |     | LMFA03020030                 | 6.9 | 339.1 | 196.9 | -70  | -22 | -19 |
| Internal standards                              | PGE2-d4                         |     | LMFA03010008                 | 4.9 | 355.1 | 193   | -50  | -26 | -17 |
| Isoprostanes (IsoP) and neuroprostanes (NeuroP) | 17-F2t-dihomo-IsoP              |     | LMFA03110167                 | 6.1 | 381.1 | 318.9 | -115 | -32 | -41 |
| Isoprostanes (IsoP) and neuroprostanes (NeuroP) | 4-F4t-NeuroP                    |     | N/A                          | 5.2 | 377.1 | 270.9 | -15  | -26 | -13 |
| Isoprostanes (IsoP) and neuroprostanes (NeuroP) | 5-F3t-IsoP                      |     | N/A                          | 3.8 | 351   | 114.8 | -95  | -26 | -13 |
| Keto-eicosatetraenoic acids (KETE/OxoETE)       | 12-KETE                         |     | LMFA03060019                 | 7.9 | 317   | 153   | -60  | -22 | -9  |
| Keto-eicosatetraenoic acids (KETE/OxoETE)       | 15-KETE                         |     | LMFA03060051                 | 7.8 | 317   | 113   | -10  | -22 | -5  |
| Keto-eicosatetraenoic acids (KETE/OxoETE)       | 5-KETE                          |     | LMFA03060011                 | 8.1 | 317   | 203.1 | -70  | -24 | -11 |
| Leukotrienes (LT)                               | 20-OH-LTB4                      | Yes | LMFA03020018                 | 4.0 | 351.1 | 195   | -60  | -24 | -17 |
| Leukotrienes (LT)                               | 6-trans-12-epi-LTB4             | Yes | LMFA03020014                 | 6.8 | 335.1 | 194.9 | -80  | -22 | -25 |
| Leukotrienes (LT)                               | 6-trans-LTB4                    | Yes | LMFA03020013                 | 6.7 | 335.1 | 194.9 | -105 | -22 | -11 |
| Leukotrienes (LT)                               | LTB4                            | Yes | LMFA03020001                 | 6.9 | 335.1 | 195   | -65  | -22 | -21 |
| Leukotrienes (LT)                               | LTD4                            | Yes | LMFA03020006                 | 6.7 | 495.1 | 177   | -70  | -28 | -19 |
| Leukotrienes (LT)                               | LTE4                            | Yes | LMFA03020002                 | 7.0 | 438.1 | 333.1 | -55  | -26 | -15 |
| Lipoxins (LX)                                   | AT-LXA4                         | Yes | LMFA03040003                 | 5.6 | 351.1 | 114.9 | -20  | -22 | -11 |
| Lipoxins (LX)                                   | LXA4                            | Yes | LMFA03040001                 | 5.5 | 351.1 | 114.8 | -40  | -20 | -11 |
| Lipoxins (LX)                                   | LXB4                            | Yes | LMFA03040002                 | 5.1 | 351.1 | 220.9 | -60  | -22 | -13 |
| Maresins (MaR)                                  | Mar1                            | Yes | LMFA04050001                 | 7.0 | 359.2 | 250.2 | -65  | -20 | -13 |
| Maresins (MaR)                                  | 7(S)-MaR1                       |     | N/A                          | 6.6 | 359.1 | 249.9 | -20  | -20 | -19 |
| Polyunsaturated fatty acids                     | AA                              | Yes | LMFA01030001                 | 8.8 | 303   | 205.1 | -155 | -20 | -11 |
| Polyunsaturated fatty acids                     | AdA                             | Yes | LMFA01030178                 | 9.1 | 331.1 | 233   | -130 | -22 | -11 |
| Polyunsaturated fatty acids                     | ALA/GLA                         | Yes | LMFA01030152<br>LMFA01030141 | 8.6 | 277   | 233   | -90  | -22 | -29 |
| Polyunsaturated fatty acids                     | ALA*                            | Yes | LMFA01030152                 | 8.6 | 277   | 182.1 | -55  | -24 | -7  |
| Polyunsaturated fatty acids                     | DGLA                            |     | LMFA01030158                 | 9.0 | 305.1 | 261.2 | -85  | -22 | -13 |
| Polyunsaturated fatty acids                     | DHA                             | Yes | LMFA01030185                 | 8.8 | 327.1 | 229.2 | -115 | -18 | -11 |
| Polyunsaturated fatty acids                     | DPAn-3                          | Yes | LMFA04000044                 | 8.9 | 329.1 | 231.1 | -50  | -20 | -17 |
| Polyunsaturated fatty acids                     | DPAn-6                          |     | LMFA01030182                 |     |       |       |      |     |     |
| Polyunsaturated fatty acids                     | EPA                             | Yes | LMFA01030759                 | 8.6 | 301   | 202.9 | -125 | -18 | -21 |
| Polyunsaturated fatty acids                     | LA                              | Yes | LMFA01030120                 | 8.8 | 279   | 261   | -115 | -28 | -13 |
| Prostaglandins (PG)                             | 13,14-dihydro-15-keto-PGF2alpha | Yes | LMFA03010027                 | 5.4 | 353.1 | 195   | -110 | -32 | -11 |
| Prostaglandins (PG)                             | 15-deoxy-PGJ2                   |     | LMFA03010021                 | 7.3 | 315   | 203   | -50  | -28 | -19 |



|                     |                 |     |              |     |       |       |      |     |     |
|---------------------|-----------------|-----|--------------|-----|-------|-------|------|-----|-----|
| Prostaglandins (PG) | 15-keto-PGE2    | Yes | LMFA03010030 | 4.5 | 349   | 234.9 | -65  | -20 | -13 |
| Prostaglandins (PG) | 8-iso-PGE2      | Yes | LMFA03110003 | 4.6 | 351.1 | 271   | -5   | -24 | -19 |
| Prostaglandins (PG) | 8-iso-PGF2alpha | Yes | LMFA03110001 | 4.5 | 353.1 | 193   | -135 | -34 | -11 |
| Prostaglandins (PG) | PGD2            | Yes | LMFA03010004 | 5.0 | 351.1 | 233   | -30  | -16 | -13 |
| Prostaglandins (PG) | PGE2            | Yes | LMFA03010003 | 4.9 | 351.2 | 271.1 | -50  | -22 | -21 |
| Prostaglandins (PG) | PGF2alpha       | Yes | LMFA03010002 | 5.2 | 353.1 | 193   | -80  | -34 | -11 |
| Prostaglandins (PG) | PGI2            | Yes | LMFA03010019 | 6.1 | 333   | 271   | -30  | -22 | -17 |
| Protectins (PD)     | PD1             |     | LMFA04040001 | 6.9 | 359.1 | 153   | -70  | -22 | -9  |
| Protectins (PD)     | PDX             | Yes | LMFA04040003 | 6.8 | 359.1 | 153   | -70  | -22 | -9  |
| Resolvins (Rv)      | 18R-RvE3        |     | LMFA03140006 | 7.1 | 333.1 | 245   | -55  | -18 | -23 |
| Resolvins (Rv)      | 18S-RvE3        |     | LMFA03140007 | 6.7 | 333.1 | 245.2 | -25  | -16 | -17 |
| Resolvins (Rv)      | AT-RvD1         |     | LMFA04030005 | 5.7 | 375   | 215   | -50  | -26 | -11 |
| Resolvins (Rv)      | RvD1            | Yes | LMFA04030011 | 5.6 | 375.1 | 215   | -50  | -26 | -11 |
| Resolvins (Rv)      | RvD2            | Yes | LMFA04030001 | 5.3 | 375.1 | 277.1 | -60  | -18 | -15 |
| Resolvins (Rv)      | RvE1            |     | LMFA03140003 | 3.8 | 349.1 | 195   | -95  | -22 | -13 |
| Resolvins (Rv)      | RvE2            |     | LMFA03140011 | 6.1 | 333.1 | 114.9 | -35  | -18 | -15 |
| Thromboxanes (Tx)   | TXB2            | Yes | LMFA03030002 | 4.6 | 369.1 | 169   | -55  | -24 | -15 |

\*due to technical limitations the signal obtained for the here applied QqQ settings for ALA might result in an approximate 10% overlap with the signal obtained from GLA

## References SI Appendix

- Körner A, et al. (2019) Sympathetic nervous system controls resolution of inflammation via regulation of repulsive guidance molecule A. Nature Communications 10(1):633**
- McWhorter FY, et al. (2013) Modulation of macrophage phenotype by cell shape. Proceedings of the National Academy of Sciences USA 110(43): 17253–17258.**
- Müller C, et al. (2017) New chemotype of selective and potent inhibitors of human delta 24-dehydrocholesterol reductase. European Journal of Medicinal Chemistry 140:305-320.**
- Ubhi BK (2018) Direct Infusion-Tandem Mass Spectrometry (DI-MS/MS) Analysis of Complex Lipids in Human Plasma and Serum Using the Lipidizer™ Platform. Clinical Metabolomics: Methods and Protocols, ed Giera M (Springer New York, New York, NY), pp 227-236.**
- Lepre S, et al. (2018) AMPK-ACC signaling modulates platelet phospholipids content and potentiates platelet function and thrombus formation. Blood 132(11):1180-1192.**
